# Supplementary material
Source: ML conference proceedings conference paper supplement (https://proceedings.neurips.cc/paper_files/paper/2018/hash/dd28e50635038e9cf3a648c2dd17ad0a-Abstract.html)
Supplement: Supplementary file [file dd28e50635038e9cf3a648c2dd17ad0a-Supplemental.zip]

## A Additional Empirical Results

Tables 2 and 3 summarize the performance of HOLEX for the head- and tail-prediction tasks, respectively. Note that the corresponding numbers are averaged when reporting the main results in Table 1 on the full task.

As has been observed in prior work, the tail-prediction task is considerably easier than head-prediction for named-entity knowledge bases such as Freebase. This is because many-to-one relations tend to be more common than one-to-many relations. For instance, many people “live in” one city or “work for” one company; where as relatively few people have been the “president of” the United States).

We see, for example, that when using 8 random 0/1 vectors in HOLEX, the tail-prediction HITS@10 metric is 90.5%, which is 5.2% higher than that for head-prediction. Similarly, the mean rank for tail-prediction is 35 in this case, compared to 58 for head prediction.

| Knowledge Completion Method            | Mean Rank | HITS@10 (%) | MRR   | HITS@5 (%) | HITS@1 (%) |
|----------------------------------------|-----------|-------------|-------|------------|------------|
| HolE (reimplemented baseline, dim=256) | 62        | 80.3        | 0.640 | 75.1       | 54.6       |
| HOLEX, 8 Haar vectors                  | 63        | 84.1        | -     | -          | -          |
| HOLEX, 2 random 0/1 vectors            | 60        | 82.8        | 0.696 | 78.7       | 61.8       |
| HOLEX, 4 random 0/1 vectors            | 59        | 84.6        | 0.740 | 81.4       | 67.7       |
| HOLEX, 8 random 0/1 vectors            | 58        | 85.3        | 0.763 | 82.5       | 70.9       |
| HOLEX, 16 random 0/1 vectors           | 61        | 86.1        | 0.777 | 83.4       | 72.8       |

Table 2: Performance of HOLEX on the head-prediction task. Table 1 reports the average of this and tail-prediction performance.

| Knowledge Completion Method            | Mean Rank | HITS@10 (%) | MRR   | HITS@5 (%) | HITS@1 (%) |
|----------------------------------------|-----------|-------------|-------|------------|------------|
| HolE (reimplemented baseline, dim=256) | 41        | 85.6        | 0.690 | 80.7       | 59.2       |
| HOLEX, 8 Haar vectors                  | 39        | 89.3        | -     | -          | -          |
| HOLEX, 2 random 0/1 vectors            | 36        | 88.0        | 0.744 | 84.1       | 66.3       |
| HOLEX, 4 random 0/1 vectors            | 35        | 89.5        | 0.785 | 86.5       | 72.0       |
| HOLEX, 8 random 0/1 vectors            | 35        | 90.5        | 0.810 | 87.5       | 75.4       |
| HOLEX, 16 random 0/1 vectors           | 37        | 91.1        | 0.823 | 88.6       | 77.2       |

Table 3: Performance of HOLEX on the tail-prediction task. Table 1 reports the average of this and head-prediction performance.

## B Proof Details

*Proof of Theorem 1.* According to the definition of the expanded holographic embedding. We have the  $j, i$ -th entry of the matrix  $h(\mathbf{a}, \mathbf{b}; \mathbf{C}_d)$  is:

$$[h(\mathbf{a}, \mathbf{b}; \mathbf{C}_d)]_{j,i} = \sum_{l=0}^{d-1} c_{i,l} a_l b_{(l+j) \bmod d}.$$

in which  $c_{i,l}$  is the  $l, i$ -th entry of the matrix  $\mathbf{C}_d$ , and  $a_l b_{(l+j) \bmod d}$  is  $\mathbf{R}_{l,j}$  – the  $l, j$ -th entry of matrix  $\mathbf{R}$ . Therefore,

$$h(\mathbf{a}, \mathbf{b}; \mathbf{C}_d)' = \mathbf{C}_d' \mathbf{R}.$$

which is equivalent to what the Theorem states.  $\square$

**Definition 1.** A random 0/1 matrix  $\mathbf{A} \in \{0, 1\}^{l \times d}$  is a matrix whose entries are chosen independently and uniformly at random from  $\{0, 1\}$ .

**Claim 1.** Suppose  $\mathbf{x}, \mathbf{y} \in \mathbb{R}^d$  are two vectors, each with exactly one non-zero entry, and at different locations. Let  $\mathbf{A} \in \{0, 1\}^{l \times d}$  be a random 0/1 matrix. Then  $\Pr(\mathbf{Ax} = \mathbf{Ay}) \leq \frac{1}{2^l}$ .

*Proof.* Suppose the  $i$ -th entry is the unique non-zero in  $\mathbf{x}$ , and similarly for the  $j$ -th entry in  $\mathbf{y}$ .  $\mathbf{Ax} = \mathbf{Ay}$  must imply that  $\mathbf{A}(:, i) = \mathbf{A}(:, j)$ . Otherwise, suppose  $\mathbf{A}_{k,i} = 1$  but  $\mathbf{A}_{k,j} = 0$ , this leads to  $\mathbf{Ax}$  to be non-zero but  $\mathbf{Ay}$  to be zero. Contradiction. Given this fact,

$$\Pr(\mathbf{Ax} = \mathbf{Ay}) \leq \Pr(\mathbf{A}(:, i) = \mathbf{A}(:, j)) = 1/2^l$$

as claimed.  $\square$

*Proof of Theorem 2.* Because  $d$  diagonal lines are mutually independent, it suffices to prove the statement holds for one diagonal line with probability at least  $1 - \eta/d$ . A union bound argument can be applied to show that the statement holds for all  $d$  diagonal lines with probability at least  $1 - \eta$ . In this case, the rest of the proof focuses on one diagonal line.

The effect of applying expanded holographic embedding with  $l$  random 0/1 vectors on one diagonal line is to multiply this diagonal line with a  $l$ -by- $d$  random 0/1 matrix  $\mathbf{A}$ . This fact can be quickly checked with the graphical example in Figure 1 (middle). Suppose  $\mathbf{x}$  and  $\mathbf{y}$  are two possible configurations of one diagonal line of interest (i.e., both  $\mathbf{x}$  and  $\mathbf{y}$  have one non-zero entry of value 1). If a random 0/1 matrix  $\mathbf{A}$  can tell apart every pairs of  $\mathbf{x}$  and  $\mathbf{y}$ , we can decide which configuration the diagonal line is actually in by examining the result of the expanded holographic embedding. In other words, it is sufficient to prove the following: *let  $l = \lceil 3 \log d - \log \eta \rceil - 1$ . sample an  $l$ -by- $d$  random 0/1 matrix  $\mathbf{A}$ , then with probability at least  $1 - \eta/d$ , we must have  $\mathbf{Ax} \neq \mathbf{Ay}$  holds, for any two vectors  $\mathbf{x}$  and  $\mathbf{y}$  with exact one non-zero entry of value 1.*

$$\Pr(\forall \mathbf{x}, \mathbf{y} \in D : \mathbf{x} \neq \mathbf{y}, \mathbf{Ax} \neq \mathbf{Ay}) \tag{10}$$

$$= 1 - \Pr(\exists \mathbf{x}, \mathbf{y} \in D : \mathbf{x} \neq \mathbf{y}, \mathbf{Ax} = \mathbf{Ay}) \tag{11}$$

$$\geq 1 - \frac{d(d-1)}{2} \Pr(\mathbf{Ax}_0 = \mathbf{Ay}_0) \tag{12}$$

$$\geq 1 - \frac{d(d-1)}{2} \frac{1}{2^l} \geq 1 - \eta/d. \tag{13}$$

Here,  $D$  is the space with vectors of exact one non-zero entry of value 1. The size of  $D$  is  $\frac{d(d-1)}{2}$ . It is a union bound argument from (2) to (3). From (3) to (4) we use Claim 1. The last inequality is because  $l \geq 3 \log d - \log \eta - 1$ .  $\square$

The proof of theorem 3 makes many connections to compressed sensing. We provide a brief review here. Many definitions and lemmas can be found in [20]. We first introduce the notion of restricted isometry property.

**Definition 2** (restricted isometry property [20]). *The restricted isometry constant  $\delta_s$  of a matrix  $\mathbf{A} \in \mathbb{R}^{m \times d}$  is defined as the smallest  $\delta_s$  such that*

$$(1 - \delta_s) \|\mathbf{x}\|_2^2 \leq \|\mathbf{Ax}\|_2^2 \leq (1 + \delta_s) \|\mathbf{x}\|_2^2$$

for all  $s$ -sparse  $\mathbf{x} \in \mathbb{R}^d$ .

It is well known that restricted isometry property implies recovery of sparse vectors, which can be shown below.

**Lemma 1** (Theorem 2.6, [20]). *Suppose the restricted isometry constants  $\delta_{2s}$  of a matrix  $\mathbf{A} \in \mathbb{R}^{m \times d}$  satisfies  $\delta_{2s} < \frac{1}{3}$ , then every  $s$ -sparse vector  $\mathbf{x}^* \in \mathbb{R}^d$  is recovered by  $\ell_1$ -minimization.*

Therefore, in order to guarantee sparse recovery of  $\mathbf{x}^*$ , we need a good matrix  $\mathbf{A}$ . It turns out that random Bernoulli matrix has good restricted isometry constant upper bound:

**Lemma 2** (Theorem 2.12, [20]). *Let  $\mathbf{A} \in \mathbb{R}^{m \times d}$  be a Bernoulli random matrix, where every entry of the matrix takes the value  $\frac{1}{\sqrt{m}}$  or  $-\frac{1}{\sqrt{m}}$  with equal probability. Let  $\epsilon, \delta \in (0, 1)$  and assume  $m \geq C\delta^{-2}(s \log(d/s)) + \log(\epsilon^{-1})$  for a universal constant  $C > 0$ . Then with probability at least  $1 - \epsilon$  the restricted isometry constant of  $\mathbf{A}$  satisfies  $\delta_s \leq \delta$ .*

**Lemma 3** (Compressed sensing). *Let  $\mathbf{A} \in \mathbb{R}^{m \times d}$  be a Bernoulli random matrix, where every entry of the matrix takes the value  $\frac{1}{\sqrt{m}}$  or  $-\frac{1}{\sqrt{m}}$  with equal probability. Let  $x^* \in \mathbb{R}^d$  be a vector with at most  $s$  non-zero entries. let  $\epsilon \in (0, 1)$  and assume*

$$m \geq C(s \log(d/s) + \log(\epsilon^{-1}))$$

*for a universal constant  $C > 0$ . Let random linear measurements  $y = \mathbf{A}x^*$  be given, and  $x$  be a solution of*

$$\min_z \|z\|_1 \quad \text{subject to} \quad y = \mathbf{A}z \quad (14)$$

*Then with probability at least  $1 - \epsilon$ ,  $x = x^*$ .*

*Proof of Lemma 3.* By setting  $\delta = \frac{1}{3}$  in Lemma 2, and using Lemma 1, Lemma 3 is proved.  $\square$

**Lemma 4.** *Let  $\epsilon \in (0, 1)$ . If  $x_1, x_2 \in \mathbb{R}^d$  have at most  $s$  non-zero entries,  $\mathbf{A} \in \mathbb{R}^{m \times d}$  is a Bernoulli random matrix,  $m \geq C(s \log(d/s) + \log(\epsilon^{-1}))$  for a universal constant  $C > 0$ . If we have  $y_1 = \mathbf{A}x_1$ ,  $y_2 = \mathbf{A}x_2$ , and  $y_1 = y_2$ , then with probability at least  $1 - \epsilon$ , we know that  $x_1 = x_2$ .*

*Proof.* Lemma 4 is a corollary of Lemma 3. Lemma 3 says that if  $x$  is sparse, then  $y$  uniquely determines  $x$  by running  $\ell_1$  regression. That means,  $y$  can be used as a certificate for testing whether the unknown vector  $x$  is what we want. Using Lemma 3, we know that by running  $\ell_1$  regression, we could recover the unique solution for both  $y_1 = \mathbf{A}x_1$  and  $y_2 = \mathbf{A}x_2$ . Since  $y_1 = y_2$ , by probability  $1 - \epsilon$ , the two programs have the same unique solution, denoted as  $x'$ .

If  $x_1 \neq x_2$ , it means  $x'$  is not the same as at least one of them. Without loss of generality, assume  $x' \neq x_1$ . This contradicts the claim of Theorem 3, which says  $x'$  equals  $x_1$ .  $\square$

*Proof of Theorem 3.* Theorem 3 is a simple corollary of Lemma 4. To prove Theorem 3, it is sufficient to prove that a  $l$ -by- $d$  Bernoulli random matrix can differentiate all  $s$ -sparse vectors with high probability, which is implied by Lemma 4.  $\square$
